# Supplementary material
Source: PubMed Central journal article supplement (PMC2700902)
Supplement: 0812114106_0812114106SI.pdf [file 0812114106_0812114106SI.pdf]

# Supporting Information

Adle et al. 10.1073/pnas.0812114106

## SI Materials and Methods

**Yeast Strains, Media and Growth Conditions.** Yeast strains used in this study are listed in Table S1. Most strains are from the *Saccharomyces* Genome Deletion Project (1) which was purchased from Open Biosystems. Double knockouts were generated by PCR-based gene deletion using pFA6a-His3MX6 as a template for homologous recombination (2). Diagnostic PCR using gene-specific primer sets confirmed correct gene deletions in all strains used in this study. Yeast cells were cultured in YPD or synthetic complete (SC) media as previously described (3).

**Construction of Expression Plasmids and Transformation.** A single copy yeast vector was used for glyceradehyde-3-phosphate dehydrogenase (GPD) gene promoter-mediated constitutive expression (4) unless specified. For the generation of expression plasmids of green fluorescent protein (GFP) or triple hemagglutinin (HA) epitope-fusion proteins, *NotI* restriction enzyme site-flanked GFP or 3 tandem HA epitopes were inserted into a *NotI* site artificially generated at the N or C-terminal end. A plasmid containing four tandem copies of the 22 nucleotide unfolded protein response element (UPRE) inserted upstream of a disabled CYC1 promoter lacZ gene fusion (5) was kindly provided by Peter Walter (University of California, School of Medicine, San Francisco). A Ste6\* expression plasmid (6) was generously provided by Susan Michaelis (John Hopkins School of Medicine, Baltimore). Site-directed mutagenesis was conducted by the primer overlap extension method (7). Plasmids were transformed into yeast using the lithium acetate procedure (8). Yeast cells were grown at 30 °C on synthetic complete (SC) media for plasmid selection.

**Preparation of Cell Extracts and Immunoblotting.** All immunoblotting was performed essentially as described previously (3). Briefly, total protein extracts were prepared by vortexing yeast cells with glass beads in PBS containing protease inhibitor mixture (Complete Mini; Roche) and 1% Triton X-100. Lysates were denatured in SDS sample buffer containing 25 mM DTT for 15 min at 37 °C and resolved by SDS-PAGE before transfer to nitrocellulose membrane and antibody probing.

**Immunoprecipitation for Detection of Ubiquitination.** Cells were broken by a glass bead vortexing in PBS containing protease inhibitors (Complete Mini; Roche), 5 mM N-ethylmaleimide, 1 mM PMSF, and 1% Triton X-100. HA epitope-tagged proteins were immunoprecipitated with an HA-Tag IP/Co-IP kit (Pierce) according to the manufacturer's specifications. Proteins were eluted by incubation of immobilized anti-HA agarose beads in 2× SDS sample buffer at 37 °C for 15 min and reduced in the presence of 0.1 M DTT for an additional 15 min at 37 °C. Ubiquitin conjugated proteins were detected by immunoblotting using mouse monoclonal antibodies against ubiquitin (Covance).

**Microsome Preparation and Chemical Cross-Linking.** Microsome preparation was performed as previously described with modifications (9). Cells ( $A_{600} = 30$ ) were disrupted by glass bead vortexing in 300  $\mu$ L lysis buffer [20 mM 4-(2-hydroxyethyl)-1-piperazineethanesulfonic acid (Hepes), 50 mM potassium acetate (KOAc), 2 mM EDTA, 0.1 M sorbitol, 1 mM DTT, 1 mM phenylmethanesulfonyl fluoride (PMSF), and HALT protease inhibitor mixture (Pierce)] for ten 30-sec intervals alternating with incubation on ice. An additional 250  $\mu$ L of buffer 88 [20 mM

Hepes, 50 mM KOAc, 250 mM sorbitol, and 5 mM magnesium acetate (MgOAc)] was added. Unbroken cells and glass beads were cleared by low speed centrifugation (3,000 rpm for 5 min) and then repeated with a second rinse with buffer 88. The supernatant fractions were pooled and centrifuged at  $18,000 \times g$  for 20 min at 4 °C. The supernatant was decanted and the final microsomal membrane pellet was washed once and re-suspended in 150  $\mu$ L of 0.2 M triethanolamine, pH 8.0 and incubated on ice for 1 h with 100  $\mu$ g/mL dimethyl 3,3'-dithiobispropionimidate (DTBP) a water soluble, membrane permeable, and thiol reversible cross-linker. Cross-linking reactions were quenched by addition of 40  $\mu$ L of 1 M Tris (pH 7.5) and incubated on ice for an additional 20 min. Cell pellets were collected by centrifugation at  $18,000 \times g$  for 15 min at 4 °C and washed with 400  $\mu$ L PBS. For membrane solubilization, cell pellets were resuspended in 100  $\mu$ L of 1% SDS in PBS and incubated at 37 °C for 30 min. Triton X-100 was added for a total concentration of 1.5% (400  $\mu$ L total volume) and incubated on ice for an additional 30 min. From this lysate, HA-tagged proteins were immunoprecipitated with anti-HA antibody-conjugated Sepharose beads (Pierce) overnight at 4 °C according to the manufacturer. Immobilized proteins were eluted with 2× SDS sample buffer at 37 °C for 15 min. Chemical cross-linking was reversed by incubation with 0.1 M DTT for an additional 15 min at 37 °C before SDS/PAGE and immunoblotting.

**$\beta$ -Galactosidase Reporter Assay.** Cells were assayed for  $\beta$ -galactosidase expression as described previously (10). Briefly, cells ( $A_{600} = 1$ ) were permeabilized with chloroform and 0.1% SDS in 1 mL Z buffer and incubated with 0.2 mL of 4 mg/mL ONPG (*ortho*-Nitrophenyl- $\beta$ -galactoside) dissolved in Z buffer. Reactions were quenched by adding 0.5 mL  $\text{Na}_2\text{CO}_3$ .  $\beta$ -Galactosidase levels were converted to Miller units [ $(A_{420})/(T_{\text{min}})(V_{\text{mL}})(A_{600})$ ].

**Oligomycin Resistance Assay.** Wild-type and  $\Delta\text{doa10}$  strains expressing empty vector, Yor1-GFP or Pca1 (1-392)-Yor1-GFP were cultured in SC selective media to mid-log phase. Cells ( $\approx 5 \mu\text{L}$ ,  $A_{600} = 0.1$ ) were spotted on solid YPEG media (2% Bacto-peptone, 1% yeast extract, 2% ethanol, 3% glycerol, and 1.5% agar), prepared with or without the addition of cadmium (10  $\mu\text{M}$   $\text{CdCl}_2$ ) and oligomycin (2.5  $\mu\text{g/mL}$ ). Plates were incubated at 30 °C for 2 days before photography.

**Purification and In Vitro Trypsin Proteolysis of Pca1 (250-350).** The coding sequence of Pca1 residues 250-350 [Pca1 (250-350)] was cloned into a glutathione sulfur transferase (GST) fusion expression vector, pGEX-6p-1 (Amersham Pharmacia Biotech Inc.) The GST-Pca1 (250-250) was expressed in *Escherichia coli* and cell lysates were prepared. The glutathione Sepharose-immobilized GST-Pca1 (250-250) was digested in metal-binding buffer (100 mM Tris-HCl, pH 7.0, 50 mM NaCl, 100 mM sucrose, 10% glycerol, 1 mM DTT, and 0.1% Triton X-100) with Pre-Scission protease (Amersham) to collect Pca1 (250-350). Pca1 (250-350) peptides were incubated with  $\text{CdCl}_2$  (0, 50, or 100  $\mu\text{M}$ ) at room temperature for 15 min. For limited trypsin proteolysis, the peptides were incubated with trypsin (1  $\mu\text{g/mL}$  final concentration) (Sigma) for 10 min on ice before addition of soybean trypsin inhibitor (0.2  $\mu\text{g/mL}$  final concentration) (Fluka Bio-Chemika) for an additional 15 min on ice. Proteolysis patterns were visualized by Coomassie blue staining.

1. Winzeler EA, et al. (1999) Functional characterization of the *S. cerevisiae* genome by gene deletion and parallel analysis. *Science* 285:901–906.
2. Longtine MS, et al. (1998) Additional modules for versatile and economical PCR-based gene deletion and modification in *Saccharomyces cerevisiae*. *Yeast* 14:953–961.
3. Adle DJ, Sinani D, Kim H, Lee J (2007) A cadmium-transporting P1B-type ATPase in yeast *Saccharomyces cerevisiae*. *J Biol Chem* 282:947–955.
4. Mumberg D, Muller R, Funk M (1995) Yeast vectors for the controlled expression of heterologous proteins in different genetic backgrounds. *Gene* 156:119–122.
5. Cox JS, Walter P (1996) A novel mechanism for regulating activity of a transcription factor that controls the unfolded protein response. *Cell* 87:391–404.
6. Loayza D, Tam A, Schmidt WK, Michaelis S (1998) Ste6p mutants defective in exit from the endoplasmic reticulum (ER) reveal aspects of an ER quality control pathway in *Saccharomyces cerevisiae*. *Mol Biol Cell* 9:2767–2784.
7. Ho SN, Hunt HD, Horton RM, Pullen JK, Pease LR (1989) Site-directed mutagenesis by overlap extension using the polymerase chain reaction. *Gene* 77:51–59.
8. Gietz RD, Schiestl RH, Willems AR, Woods RA (1995) Studies on the transformation of intact yeast cells by the LiAc/SS-DNA/PEG procedure. *Yeast* 11:355–360.
9. Nakatsukasa K, Huyer G, Michaelis S, Brodsky JL (2008) Dissecting the ER-associated degradation of a misfolded polytopic membrane protein. *Cell* 132:101–112.
10. Guarente L (1983) Yeast promoters and lacZ fusions designed to study expression of cloned genes in yeast. *Methods Enzymol* 101:181–191.
11. Metzger MB, Maurer MJ, Dancy BM, Michaelis S (2008) Degradation of a cytosolic protein requires endoplasmic reticulum-associated degradation machinery. *J Biol Chem* 283:32302–32316.
12. Novick P, Ferro S, Schekman R (1981) Order of events in the yeast secretory pathway. *Cell* 25:461–469.
13. Ye Y, Meyer HH, Rapoport TA (2001) The AAA ATPase Cdc48/p97 and its partners transport proteins from the ER into the cytosol. *Nature* 414:652–656.
14. Becker J, Walter W, Yan W, Craig EA (1996) Functional interaction of cytosolic hsp70 and a DnaJ-related protein, Ydj1p, in protein translocation in vivo. *Mol Cell Biol* 16:4378–4386.

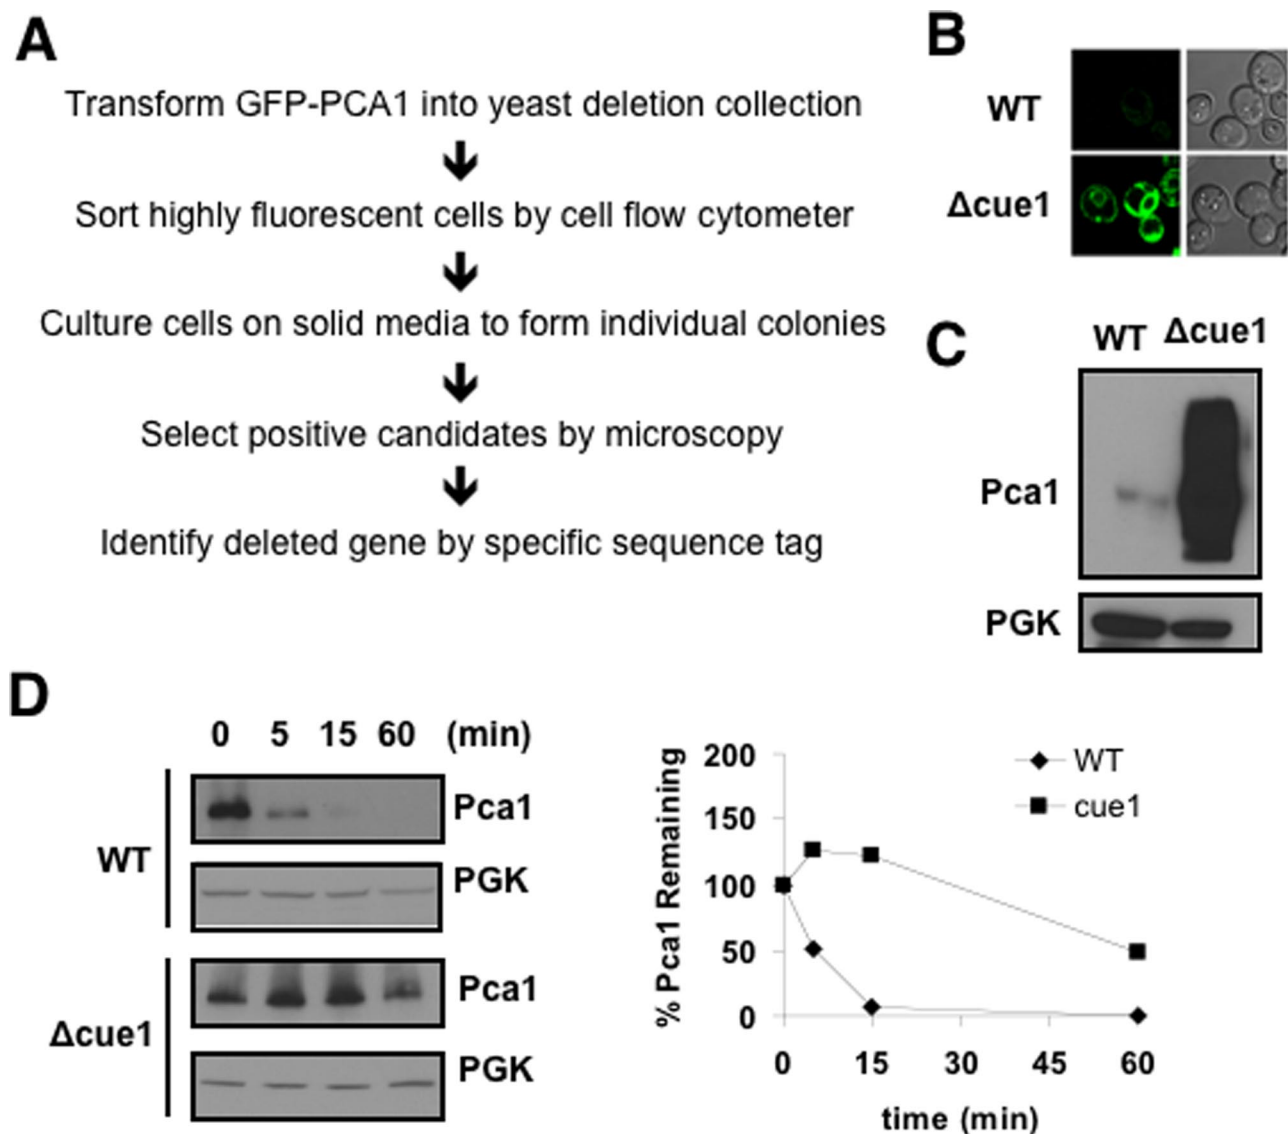

**Fig. S1.** Genetic screen conducted to identify factors involved in Pca1 turnover. (A) Schematic of the strategy for identifying factors involved in Pca1 turnover. (B) Confocal fluorescence microscopy of wild-type (WT) or  $\Delta cue1$  cells expressing GFP-fused Pca1. (C) Western blot of HA epitope-tagged Pca1 expressed in  $\Delta cue1$  cells. Phosphoglycerate kinase (PGK) was probed as a loading control. (D) Cycloheximide chase and western blotting of HA-Pca1 in a  $\Delta cue1$  strain. Each blot was probed for PGK to determine equal loading. Pca1 levels at each time point were measured by the quantification of pixel densities and normalized to those of PGK (Right). Data are representative of at least 3 independent experiments.

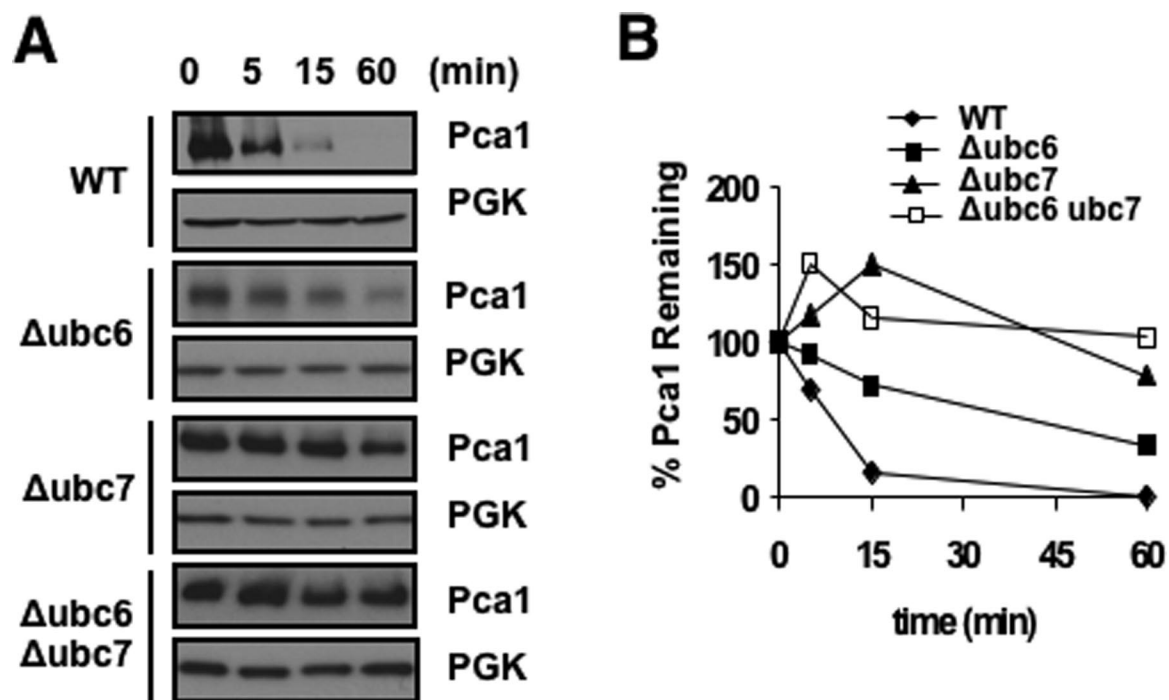

**Fig. S2.** Roles for Ubc7 and Ubc6 ubiquitin-conjugating enzymes in Pca1 turnover. (A) Cycloheximide chase and immunoblotting of HA epitope-tagged Pca1 expressed in WT,  $\Delta$ ubc6,  $\Delta$ ubc7, or  $\Delta$ ubc6  $\Delta$ ubc7 strains at the indicated time points. Representative data from 3 independent experiments is shown. (B) For quantification, pixel densities of Pca1 were normalized to those of PGK.

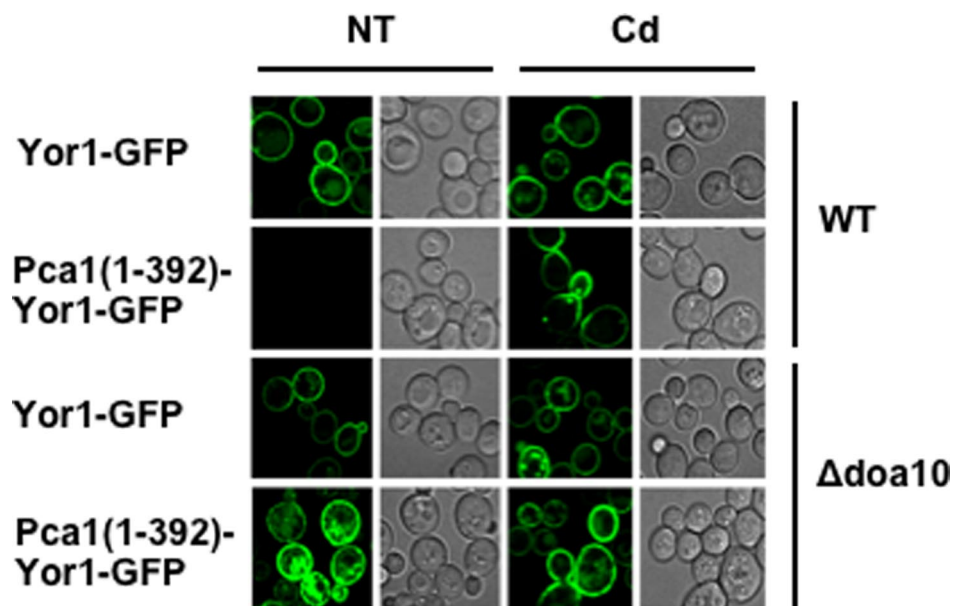

**Fig. S3.** Doa10 and cadmium-dependent turnover of Yor1 fused with the Pca1 N-terminal regulatory domain. Empty vector, Yor1-GFP, or Pca1 (1-392)-Yor1-GFP expression constructs were transformed in WT and  $\Delta$ doa10 strains. Cells were cultured in non-treated (NT) liquid media or with cadmium ( $50 \mu\text{M}$   $\text{CdCl}_2$ , 1 h). Relative expression of Yor1-GFP fusion constructs was determined by confocal fluorescence microscopy.

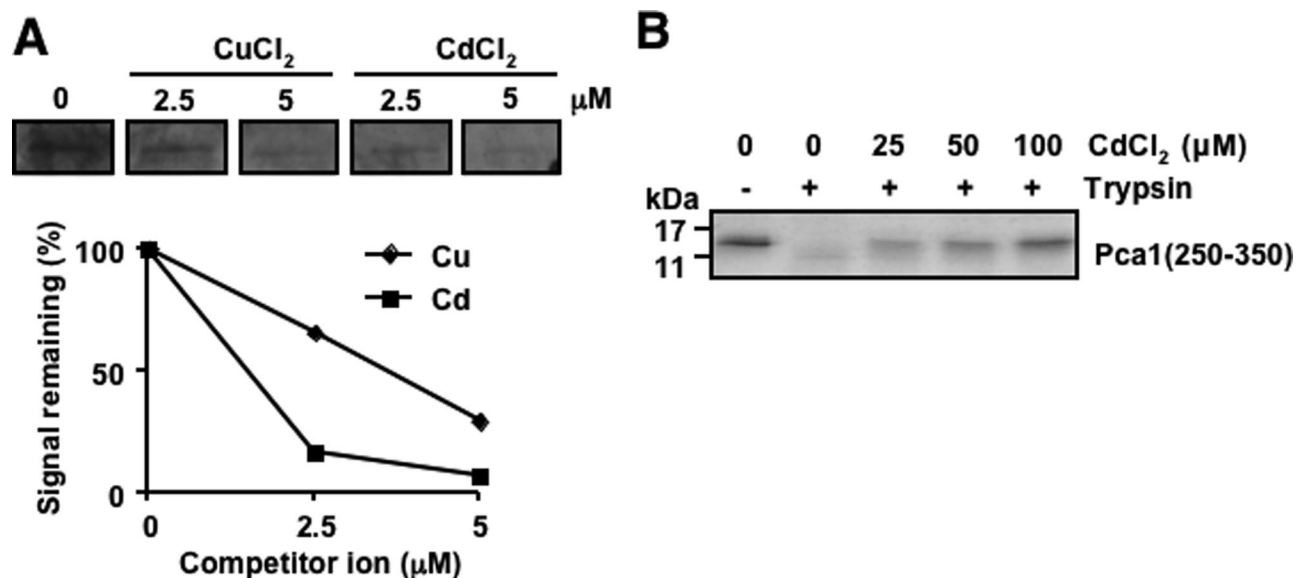

**Fig. S4.** Metal binding and conformational changes within the Pca1 degron. (A) Competition of  $^{64}\text{Cu}$  binding by copper and cadmium. Pca1 amino acid residues 250–350 tagged with triple HA epitope at the N terminus [HA-Pca1 (250–350)] were expressed in a  $\Delta\text{doa10}$  strain. Immunoprecipitated HA-Pca1 (250–350) were subjected to  $^{64}\text{Cu}$  (1  $\mu\text{M}$   $\text{CuCl}_2$ , 10  $\mu\text{Ci}$ ) blotting assays followed by autoradiography (see *Material and Methods*).  $^{64}\text{Cu}$  blotting was performed in the presence of (0, 2.5, or 5  $\mu\text{M}$ ) of copper ( $\text{CuCl}_2$ ) or cadmium ( $\text{CdCl}_2$ ) competitor ions. Graph (Lower) is the quantification of pixel densities. (B) Cadmium-dependent protection of Pca1 (250–350) from trypsin proteolysis. Purified Pca1 (250–350) was incubated in metal binding buffer (see *SI Materials and Methods*) with the indicated concentrations of  $\text{CdCl}_2$  and subjected to limited trypsin proteolysis. Pca1 (250–350) was visualized by Coomassie stain following SDS/PAGE.

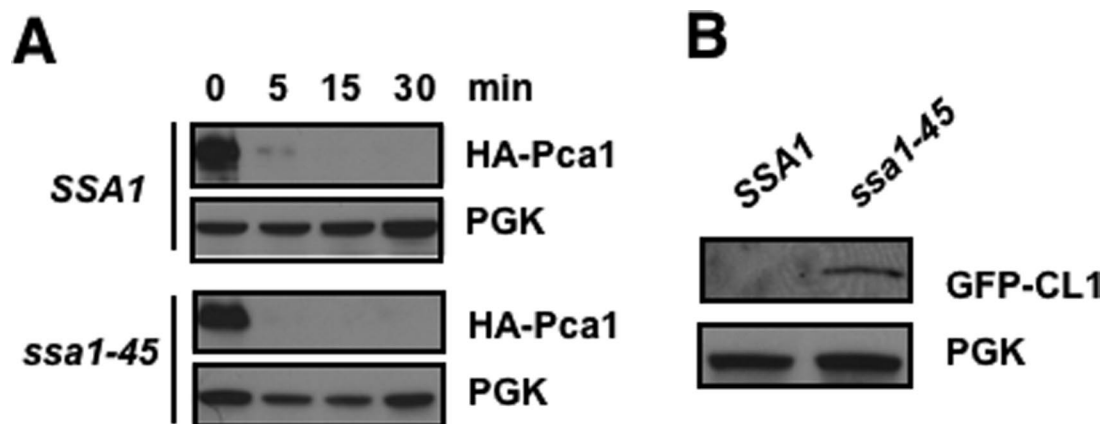

**Fig. S5.** Hsp70 chaperones do not affect Pca1 turnover. Cycloheximide chase and western blotting of HA-Pca1 (A) and GFP-CL1 (B) in the *SSA1* and *ssa1-45* strains. In these yeast cells, other cytosolic Hsp70 chaperones, including SSA2, SSA3, and SSA4, were deleted (14). Cells were precultured at 37 °C for 1 h to inactivate *ssa1-45* before supplementation of cyclohexamide (100  $\mu$ g/mL). Expression levels of HA-Pca1 at 0, 5, 15, and 30 min were determined by immunoblotting with anti-HA antibodies. GFP-CL1 expression was measured after culturing cells at 37 °C for 1 h by immunoblotting using anti-GFP antibodies. Each blot was probed for PGK to determine equal loading.

| Strain                             | Genotype                                                                                  | Ref.            |
|------------------------------------|-------------------------------------------------------------------------------------------|-----------------|
| BY4741                             | <i>MATa his3Δ1 leu2Δ0 met15Δ0 ura3Δ0</i>                                                  | Open Biosystems |
| BY4741 Δ <i>cue1</i>               | <i>MATa his3Δ1 leu2Δ0 met15Δ0 ura3Δ0 cue1::KanMX</i>                                      | Open Biosystems |
| BY4741 Δ <i>doa10</i>              | <i>MATa his3Δ1 leu2Δ0 met15Δ0 ura3Δ0 doa10::KanMX</i>                                     | Open Biosystems |
| BY4741 Δ <i>hrd1</i>               | <i>MATa his3Δ1 leu2Δ0 met15Δ0 ura3Δ0 hrd1::KanMX</i>                                      | Open Biosystems |
| BY4741Δ <i>hrd1</i> Δ <i>doa10</i> | <i>MATa his3Δ1 leu2Δ0 met15Δ0 ura3Δ0 hrd1::KanMX doa10::HIS3</i>                          | This study      |
| BY4741 Δ <i>ubc6</i>               | <i>MATa his3Δ1 leu2Δ0 met15Δ0 ura3Δ0 ubc6::HIS3</i>                                       | (11)            |
| BY4741 Δ <i>ubc7</i>               | <i>MATa his3Δ1 leu2Δ0 met15Δ0 ura3Δ0 ubc7::KanMX</i>                                      | Open Biosystems |
| BY4741 Δ <i>ubc6</i> Δ <i>ubc7</i> | <i>MATa his3Δ1 leu2Δ0 met15Δ0 ura3Δ0 ubc6::HIS3 ubc7::NatMX</i>                           | (11)            |
| SEC23                              | <i>MATα ura3–52 leu2–3,-112</i>                                                           | (12)            |
| <i>sec23–1</i>                     | <i>MATα ura3–52 his4–619 sec23–1</i>                                                      | (12)            |
| CDC48                              | <i>MATa ura3–52 his3Δ200 leu2Δ1 trpΔ63</i>                                                | (13)            |
| <i>cdc48–1</i>                     | <i>MATa ura3–52 his3Δ200 leu2Δ1 trpΔ63 cdc48–3</i>                                        | (13)            |
| SSA1                               | <i>MATα his3–11,3–15leu2–3,2–112 ura3–52 trp1–Δ1 lys2 SSA1 ssa2–1 ssa3–1 ssa4–2</i>       | (14)            |
| <i>ssa1–45</i>                     | <i>MATα his3–11,3–15leu2–3,2–112 ura3–52 trp1–Δ1 lys2 ssa1–45BKD ssa2–1 ssa3–1 ssa4–2</i> | (14)            |
| W303–1b                            | <i>MATα ade2 his3 leu2 ura3 trp1 can1–100</i>                                             | (9)             |
| KNY111                             | <i>MATα ade2 his3 leu2 ura3 trp1 can1–100 DOA10–13MYC-KANMX</i>                           | (9)             |
